# Supplementary material for: Vielfalt als Chance
Source: Springer Nature journal article supplement (doi:10.1007/s00058-022-2936-4), 2022-10-01
Supplement: MOESM1 [file 23561292]

## Tabelle 1

### zum Beitrag „Vielfalt als Chance“ von Katja Marquardt

Heilberufe (74) 10/2022, S. 44-45

**Tabelle 1**

| <b>Mögliche DiM-Maßnahmen für Kliniken/Pflegeeinrichtungen</b> |                                                                                                                                                                                                                                                                                                   |
|----------------------------------------------------------------|---------------------------------------------------------------------------------------------------------------------------------------------------------------------------------------------------------------------------------------------------------------------------------------------------|
| Geschlecht                                                     | <ul style="list-style-type: none"><li>o Recruiting- sowie Beförderungsprozesse geschlechtsneutral gestalten</li><li>o Geschlechtergemischte Teams (mindestens 30% Frauen bzw. Männer)</li><li>o Führungskräfte trainings mit Fokus auf unbewusste Vorurteile („Unconscious Bias“)</li></ul>       |
| Alter                                                          | <ul style="list-style-type: none"><li>o Altersgerechte Arbeitsplätze einrichten</li><li>o Mentoring- oder Wissenstransfer-Programme durchführen</li><li>o Flexible Arbeitsmodelle anbieten</li><li>o Jung und Alt in Teams zusammenbringen</li><li>o Gesundheitsmanagement einführen</li></ul>    |
| Ethnische Herkunft und Nationalität                            | <ul style="list-style-type: none"><li>o Diverse Teamzusammensetzung</li><li>o Führungskräfte vorbereiten</li><li>o interkulturelle Trainings anbieten</li><li>o interkulturelle Netzwerke initiieren</li><li>o Stellenanzeigen international schalten</li><li>o Sprachtrainings fördern</li></ul> |
| Religion und Weltanschauung                                    | <ul style="list-style-type: none"><li>o Religiöse Feiertage beachten, z.B. bei der Urlaubsplanung oder bei wichtigen Meetings</li><li>o Kantinenangebot an religiöse Bräuche anpassen</li><li>o Räume der Stille einrichten</li><li>o Interkulturellen Kalender nutzen</li></ul>                  |
| Körperliche und geistige Fähigkeiten                           | <ul style="list-style-type: none"><li>o Barrierefreie Arbeitsplätze einrichten</li><li>o Mit Organisationen kooperieren</li><li>o Jugendliche mit Schwerbehinderung in der Ausbildung fördern</li><li>o Spezifische Talente aller Menschen fördern</li></ul>                                      |
| Sexuelle Orientierung                                          | <ul style="list-style-type: none"><li>o LGBTIQ-Netzwerk initiieren</li><li>o Lebenspartnerschaften gleichstellen (z.B. Altersversorgung, kostenfreie Kontoführung)</li><li>o generelle Bestandsaufnahme von Regelungen durchführen, um Diskriminierungen zu identifizieren</li></ul>              |

Quelle: Charta der Vielfalt
